# Supplementary material for: Preservation of the Foveal Avascular Zone in Achromatopsia Despite the Absence of a Fully Formed Pit
Source: PubMed Central journal article supplement (PMC7463179; doi:10.1167/iovs.61.10.52), 2020-08-31
Supplement: iovs-61-10-52_s001.pdf [file iovs-61-10-52_s001.pdf]

**Supplementary Table 1. Demographics and data summary for all subjects used**

| Subject  | Sex | Age (years) | Genotype       | Eye* | OCT Grade† | OCT-A Device‡ | FAZ Present§ | FAZ Analyzable |
|----------|-----|-------------|----------------|------|------------|---------------|--------------|----------------|
| JC_11444 | F   | 26          | None (Control) | OD   | NA         | AngioVue      | Yes          | Yes            |
| TC_11579 | M   | 10          | B3             | OD   | 1          | AngioVue      | Yes          | Yes            |
| JC_10249 | M   | 19          | B3             | OD   | 1          | AngioVue      | Yes          | Yes            |
| JC_11326 | F   | 25          | B3             | OS   | 1          | AngioVue      | Yes          | Yes            |
| MM_0096  | F   | 31          | B3             | OD   | 1          | PE 9000       | Yes          | Yes            |
| JC_11664 | M   | 36          | B3             | OD   | 1          | AngioVue      | Yes          | Yes            |
| JC_12000 | F   | 57          | B3             | OD   | 1          | AngioVue      | Yes          | Yes            |
| JC_11623 | M   | 15          | B3             | OD   | 2          | AngioVue      | Yes          | Yes            |
| MM_0362  | F   | 16          | B3             | OD   | 2          | PE 9000       | Yes          | Yes            |
| MM_0162  | F   | 19          | B3             | OD   | 2          | PE 9000       | Yes          | Yes            |
| JC_1208  | M   | 21          | B3             | OD   | 2          | AngioVue      | Yes          | Yes            |
| JC_10069 | M   | 22          | A3             | OD   | 2          | AngioVue      | Yes          | Yes            |
| MM_0328  | F   | 25          | B3             | OD   | 2          | PE 9000       | Yes          | Yes            |
| JC_10853 | F   | 31          | B3             | OD   | 2          | AngioVue      | Yes          | Yes            |
| JC_11871 | M   | 31          | B3             | OD   | 2          | AngioVue      | Yes          | Yes            |
| JC_10494 | M   | 31          | B3             | OD   | 2          | AngioVue      | Yes          | Yes            |
| JC_11860 | M   | 34          | B3             | OD   | 2          | AngioVue      | Yes          | Yes            |
| MM_0345  | F   | 34          | B3             | OD   | 2          | PE 9000       | Yes          | Yes            |
| MM_0359  | F   | 35          | B3             | OD   | 2          | PE 9000       | Yes          | Yes            |
| JC_10224 | F   | 41          | B3             | OD   | 2          | AngioVue      | Yes          | Yes            |
| JC_11990 | F   | 21          | B3             | OD   | 4          | AngioVue      | Yes          | Yes            |
| MM_0171  | M   | 23          | A3             | OD   | 4          | PE 9000       | Yes          | Yes            |
| JC_10247 | M   | 28          | B3             | OS   | 4          | AngioVue      | Yes          | Yes            |
| JC_10854 | F   | 34          | B3             | OD   | 4          | AngioVue      | Yes          | Yes            |
| MM_0014  | F   | 35          | A3             | OD   | 4          | PE 9000       | Yes          | Yes            |
| MM_0375  | F   | 22          | B3             | OD   | 1          | PE 9000       | Yes          | No             |
| MM_0064  | F   | 25          | A3             | OD   | 2          | PE 9000       | Yes          | No             |
| JC_10968 | M   | 46          | B3             | OD   | 2          | AngioVue      | Yes          | No             |
| JC_11859 | F   | 23          | B3             | OD   | 3          | AngioVue      | Yes          | No             |
| JC_10151 | F   | 14          | B3             | OD   | 4          | AngioVue      | Yes          | No             |
| JC_0686  | F   | 55          | B3             | OD   | 4          | AngioVue      | Yes          | No             |
| MM_0004  | M   | 30          | B3             | OD   | 5          | PE 9000       | Yes          | No             |
| JC_10250 | M   | 21          | B3             | OS   | 1          | AngioVue      | ND           | NA             |
| JC_11091 | F   | 33          | B3             | OD   | 1          | AngioVue      | ND           | NA             |
| KS_10088 | F   | 68          | A3             | OD   | 1          | AngioVue      | ND           | NA             |
| MM_0099  | M   | 13          | B3             | OD   | 2          | PE 9000       | ND           | NA             |
| MM_0120  | M   | 13          | B3             | OD   | 2          | PE 9000       | ND           | NA             |
| MM_0072  | F   | 14          | B3             | OD   | 2          | PE 9000       | ND           | NA             |
| JC_12001 | F   | 61          | B3             | OD   | 2          | AngioVue      | ND           | NA             |
| MM_0387  | M   | 19          | A3             | OD   | 4          | PE 9000       | ND           | NA             |
| JC_10167 | F   | 20          | B3             | OD   | 4          | AngioVue      | ND           | NA             |
| JC_10196 | F   | 36          | B3             | OD   | 4          | AngioVue      | ND           | NA             |
| JC_10226 | F   | 41          | B3             | OD   | 5          | AngioVue      | ND           | NA             |

\*OD = right; OS = left

†OCT grade refers to the level of disruption of the ellipsoid zone, defined by Sundaram *et al.* (2014)

‡PE 9000 = Plex Elite 9000

§ND = not determined

||NA = not applicable
