# Supplementary material for: Preservation of the Foveal Avascular Zone in Achromatopsia Despite the Absence of a Fully Formed Pit
Source: PubMed Central journal article supplement (PMC7463179; doi:10.1167/iovs.61.10.52), 2020-08-31
Supplement: iovs-61-10-52_s002.pdf [file iovs-61-10-52_s002.pdf]

**Supplementary Table 2. Previous Reporting of ACHM Subjects**

| Subject ID in Current Study | Sundaram et al (2014) & Aboshiha et al (2014) | Dubis et al (2014) | Scoles et al (2014) | Langlo et al (2016) | Langlo et al (2017) | Hirji et al (2018) | Georgiou et al (2019) | Litts et al (2020) | Georgiou et al (2020) |
|-----------------------------|-----------------------------------------------|--------------------|---------------------|---------------------|---------------------|--------------------|-----------------------|--------------------|-----------------------|
| TC_11579                    |                                               |                    |                     |                     |                     |                    |                       |                    |                       |
| JC_10249                    |                                               |                    |                     | UFC-009             | UFC-009             |                    |                       |                    |                       |
| JC_11326                    |                                               |                    |                     |                     |                     |                    |                       |                    |                       |
| MM_0096                     |                                               |                    |                     |                     |                     | 34                 |                       |                    |                       |
| JC_11664                    |                                               |                    |                     |                     |                     |                    |                       |                    |                       |
| JC_12000                    |                                               |                    |                     |                     |                     |                    |                       |                    |                       |
| JC_11623                    |                                               |                    |                     |                     |                     |                    |                       |                    |                       |
| MM_0362                     |                                               |                    |                     |                     |                     |                    |                       |                    |                       |
| MM_0162                     | 23                                            |                    |                     |                     |                     | 24                 |                       | same ID            | same ID               |
| JC_1208                     |                                               | same ID            |                     | PCI-009             | PCI-009             |                    |                       | same ID            | same ID               |
| JC_10069                    |                                               |                    | same ID             |                     |                     |                    | same ID               | same ID            | same ID               |
| MM_0328                     |                                               |                    |                     |                     |                     |                    |                       | same ID            | same ID               |
| JC_10853                    |                                               |                    |                     | PCI-032             |                     |                    |                       | same ID            | same ID               |
| JC_11871                    |                                               |                    |                     |                     |                     |                    |                       |                    |                       |
| JC_10494                    |                                               |                    |                     |                     |                     |                    |                       |                    |                       |
| JC_11860                    |                                               |                    |                     |                     |                     |                    |                       |                    |                       |
| MM_0345                     |                                               |                    |                     |                     |                     |                    |                       | same ID            | same ID               |
| MM_0359                     |                                               |                    |                     |                     |                     |                    |                       |                    |                       |
| JC_10224                    |                                               |                    |                     | PCI-021             | PCI-021             |                    |                       | same ID            |                       |
| JC_11990                    |                                               |                    |                     |                     |                     |                    |                       |                    |                       |
| MM_0171                     | 5                                             |                    |                     |                     |                     | 5                  | same ID               |                    | same ID               |
| JC_10247                    |                                               |                    |                     | UFC-001             | UFC-001             |                    |                       | same ID            |                       |
| JC_10854                    |                                               |                    |                     | PCI-033             |                     |                    |                       | same ID            |                       |
| MM_0014                     | 12                                            |                    |                     |                     |                     | 12                 | same ID               |                    |                       |
| MM_0375                     |                                               |                    |                     |                     |                     |                    |                       |                    |                       |
| MM_0064                     | 6                                             |                    |                     |                     |                     | 6                  | same ID               |                    | same ID               |
| JC_10968                    |                                               |                    |                     | PCI-034             |                     |                    |                       |                    |                       |
| JC_11859                    |                                               |                    |                     |                     |                     |                    |                       |                    |                       |
| JC_10151                    |                                               |                    |                     | PCI-006             | PCI-006             |                    |                       | same ID            |                       |
| JC_0686                     |                                               |                    |                     |                     |                     |                    |                       |                    |                       |
| MM_0004                     | 28                                            | same ID            |                     |                     |                     | 28                 |                       |                    |                       |
| JC_10250                    |                                               |                    |                     | UFC-008             | UFC-008             |                    |                       |                    |                       |
| JC_11091                    |                                               |                    |                     |                     |                     |                    |                       |                    |                       |
| KS_10088                    |                                               |                    | same ID             |                     |                     |                    | same ID               |                    | same ID               |
| MM_0099                     |                                               |                    |                     |                     |                     |                    |                       |                    |                       |
| MM_0120                     |                                               |                    |                     |                     |                     | 38                 |                       |                    |                       |
| MM_0072                     |                                               |                    |                     |                     |                     | 40                 |                       |                    |                       |
| JC_12001                    |                                               |                    |                     |                     |                     |                    |                       |                    |                       |
| MM_0387                     |                                               |                    |                     |                     |                     |                    | same ID               |                    |                       |
| JC_10167                    |                                               |                    |                     | BPE-003             | BPE-003             |                    |                       | same ID            |                       |
| JC_10196                    |                                               |                    |                     | UFC-002             | UFC-002             |                    |                       | same ID            |                       |
| JC_10226                    |                                               |                    |                     | UFC-010             |                     |                    |                       |                    |                       |

References

- Aboshiha J, Dubis AM, Cowing J, et al. A prospective longitudinal study of retinal structure and function in achromatopsia. *Invest Ophthalmol Vis Sci* 2014;55:5733-5743.
- Dubis AM, Cooper RF, Aboshiha J, et al. Genotype-dependent variability in residual cone structure in achromatopsia: towards developing metrics for assessing cone health. *Invest Ophthalmol Vis Sci* 2014;55:7303-7311.
- Georgiou M, Litts KM, Kalitzeos A, et al. Adaptive optics retinal imaging in CNGA3-associated achromatopsia: Retinal characterization, interocular symmetry, and intrafamilial variability. *Invest Ophthalmol Vis Sci* 2019;60:383-396.
- Georgiou M, Litts KM, Singh N, Kane T, Patterson EJ, Hirji N, Kalitzeos A, Dubra A, Michaelides M, Carroll J. Intraobserver repeatability and interobserver reproducibility of foveal cone density measurements in CNGA3- and CNGB3-achromatopsia. *Trans Vis Sci Tech.* 2020;9:37.
- Hirji N, Georgiou M, Kalitzeos A, et al. Longitudinal assessment of retinal structure in achromatopsia patients with long-term follow-up. *Invest Ophthalmol Vis Sci* 2018;59:5735-5744.
- Langlo CS, Patterson EJ, Higgins BP, et al. Residual foveal cone structure in CNGB3-associated achromatopsia. *Invest Ophthalmol Vis Sci* 2016;57:3984-3995.
- Langlo CS, Erker LR, Parker M, et al. Repeatability and longitudinal assessment of foveal cone structure in CNGB3-associated achromatopsia. *Retina* 2017;37:1956-1966.
- Litts KM, Georgiou M, Langlo CS, et al. Interocular symmetry of foveal cone topography in congenital achromatopsia. *Curr Eye Res* 2020;1-8.
- Scoles D, Sulai YN, Langlo CS, et al. In vivo imaging of human cone photoreceptor inner segments. *Invest Ophthalmol Vis Sci* 2014;55:4244-4251.
- Sundaram V, Wilde C, Aboshiha J, et al. Retinal structure and function in achromatopsia: implications for gene therapy. *Ophthalmology* 2014;121:234-245.
