# Supplementary material for: Preservation of the Foveal Avascular Zone in Achromatopsia Despite the Absence of a Fully Formed Pit
Source: PubMed Central journal article supplement (PMC7463179; doi:10.1167/iovs.61.10.52), 2020-08-31
Supplement: iovs-61-10-52_s003.pdf [file iovs-61-10-52_s003.pdf]

## Preservation of the FAZ in Achromatopsia – Supplementary Figure 1

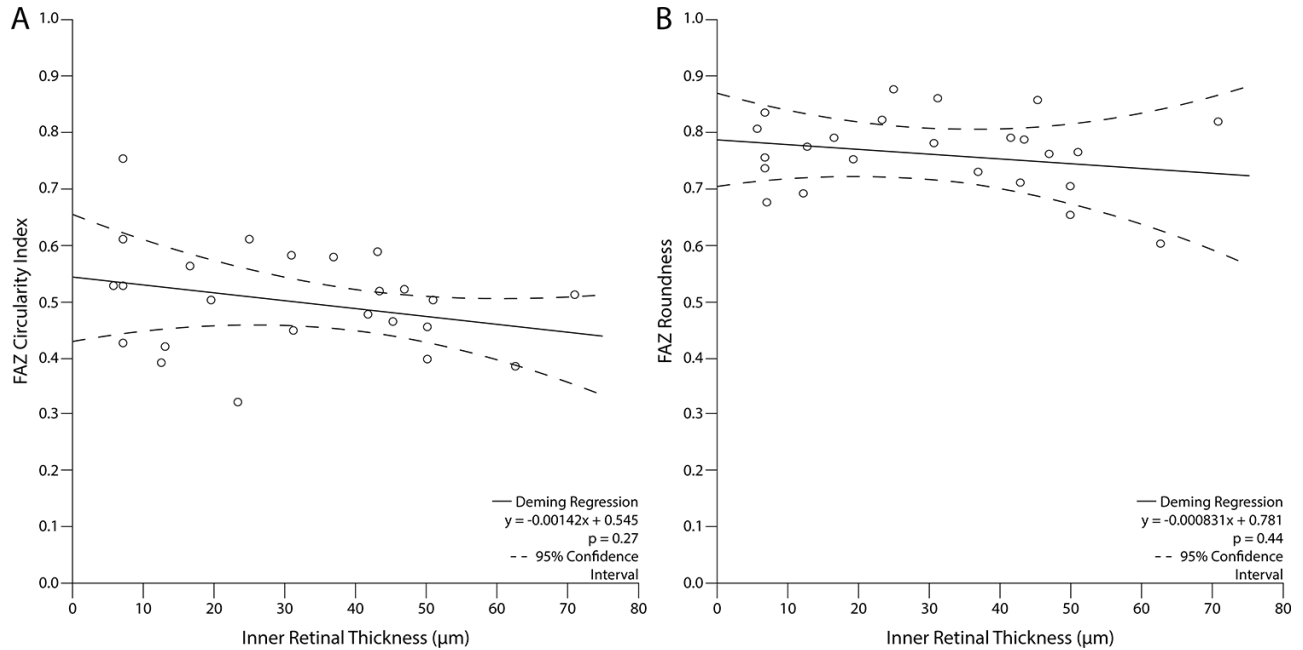

**Supplementary Figure 1.** Relationship between inner retinal layer thickness and FAZ shape in subjects with ACHM. **(A)** There was no significant relationship between inner retinal layer thickness and FAZ circularity index in subjects with ACHM (Deming regression:  $y = -0.000142x + 0.545$ ,  $p = 0.27$ ). **(B)** There was also no significant relationship between inner retinal layer thickness and FAZ roundness in subjects with ACHM (Deming regression:  $y = -0.000831x + 0.785$ ,  $p = 0.44$ ). 95% confidence intervals (dashed lines) were calculated using the jackknife method. See main manuscript text for definitions of FAZ circularity index and FAZ roundness.
